# Supplementary material
Source: HighWire-hosted journal article supplement (doi:10.1101/rna.075028.120)

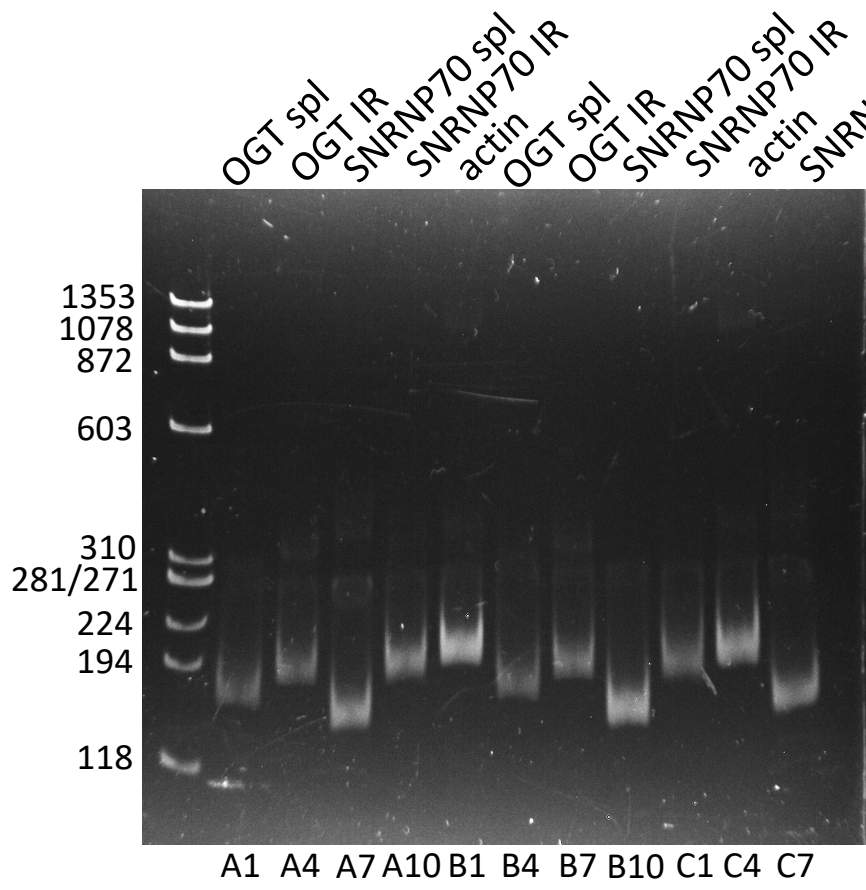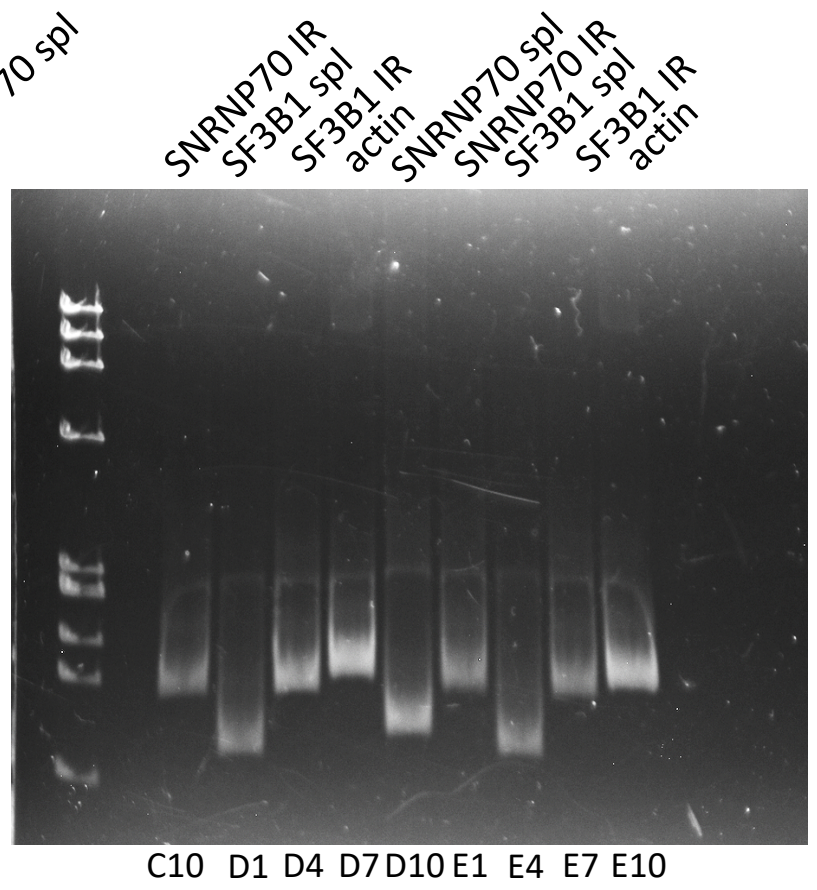

OGT

SPTA1 70 SF3B1 actin

spl IR

spl IR spl IR spl IR

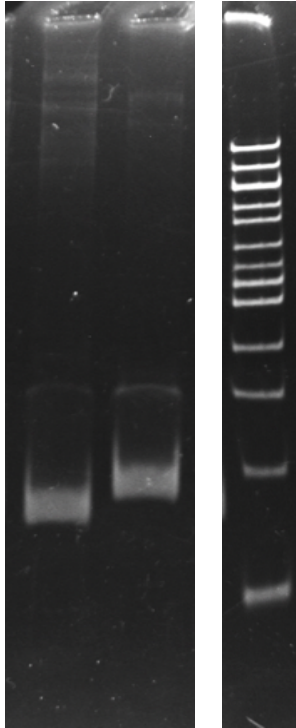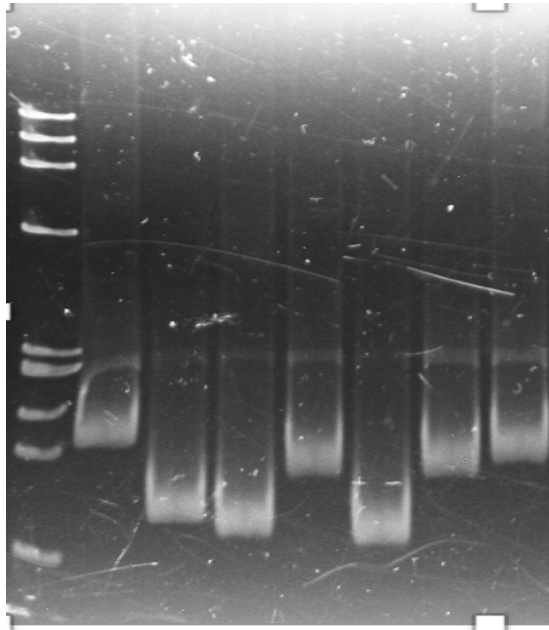

062419 RT-qPCR #1

SPTA1, SNRNP70, SF3B1 qPCR  
D7,D11,D15 09.16.19 #1.tif

|         | <u>Spliced</u> | <u>IR</u> |
|---------|----------------|-----------|
| SF3B1   | 138nt          | 173nt     |
| SNRNP70 | 140nt          | 178nt     |
| OGT     |                |           |
| SPTA1   | ~180nt         | ~140nt    |

# 062419 RT-qPCR #1

primers: OGT IR OGT spliced actin OGT IR OGT spliced

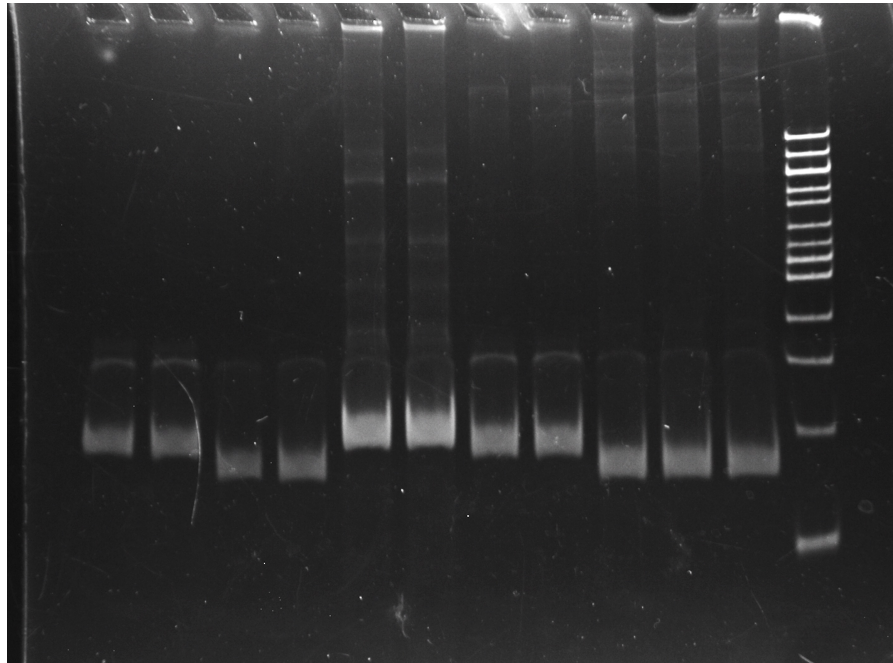

template: DNA standards erythroblast cDNA

primers:

OGT spl  
OGT IR  
actin  
OGT spl

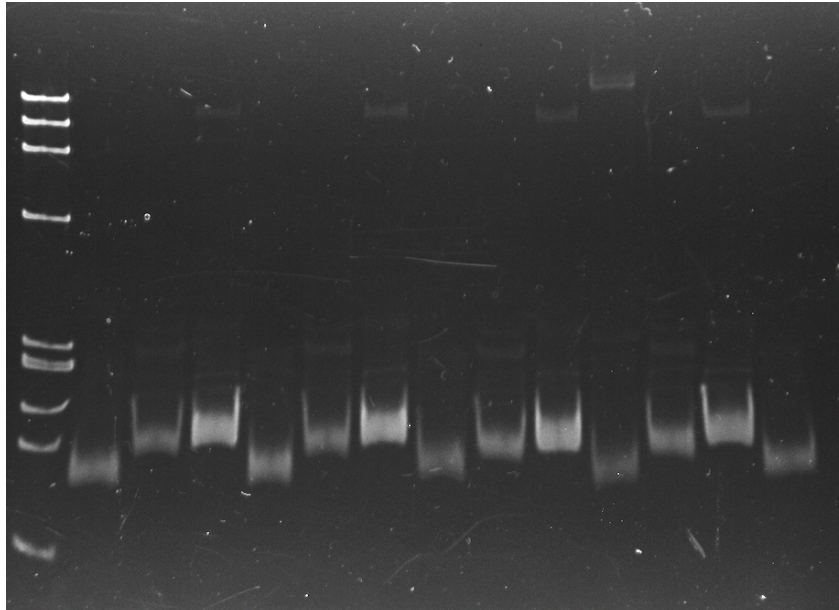

OGT IR  
actin  
OGT spl  
OGT IR  
actin  
OGT spl  
OGT IR  
actin  
OGT spl  
OGT IR  
actin

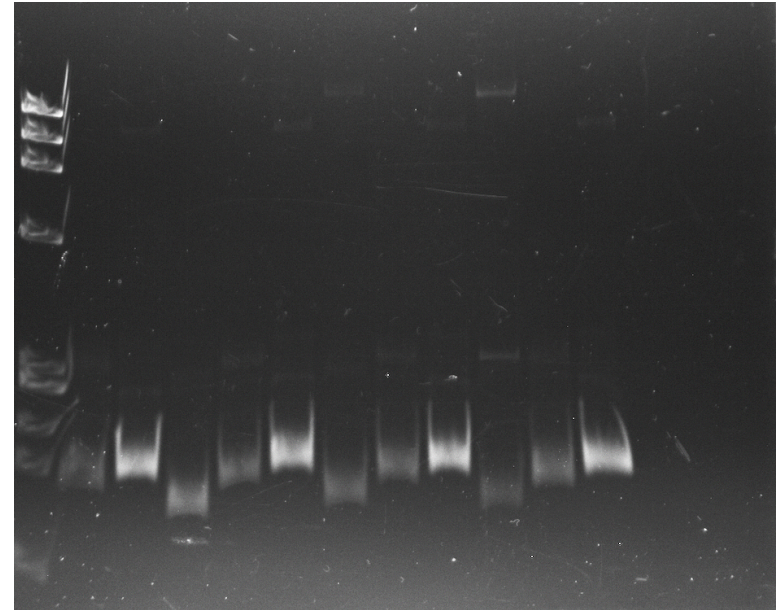

A1 A4 A7 A10 B1 B4 B7 B10 C1 C4 C7

qPCR OGT, SNRNP70, SF3B1 10.19.19.tif

SPTA1, SNRNP70, SF3B1 qPCR D7,D11,D15 09.16.19 #1.tif

primers:

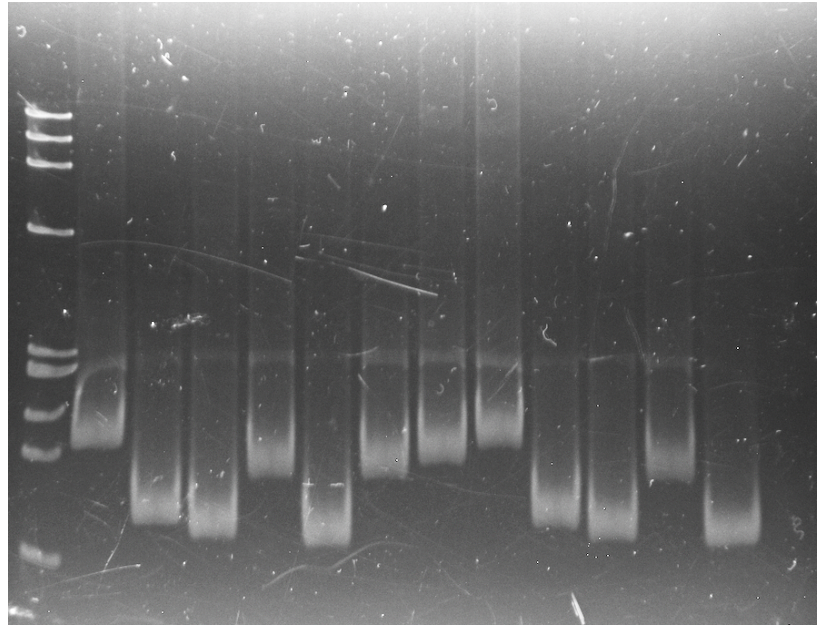

Supplement: Supplemental_Fig_S1.pdf [file Supplemental_Fig_S1.pdf]
